# Supplementary material for: Short-Term Effects of Ambient Air Pollution on Chronic Obstructive Pulmonary Disease Admissions in Jiuquan, China
Source: MDPI journal article supplement (doi:10.3390/toxics12050364), 2024-05-15
Supplement: s1 [file s1]

## Supplemental Materials

### Short-Term Effects of Ambient Air Pollution on Chronic Obstructive Pulmonary Disease Admissions in Jiuquan, China

**Figure S1.** Association with a 10  $\mu\text{g}/\text{m}^3$  increase in air pollutants for COPD admissions using single, two pollutant models.

**Table S1.** Association between COPD admissions and ambient air pollutants: sensitivity varying controls in the regression time spline.

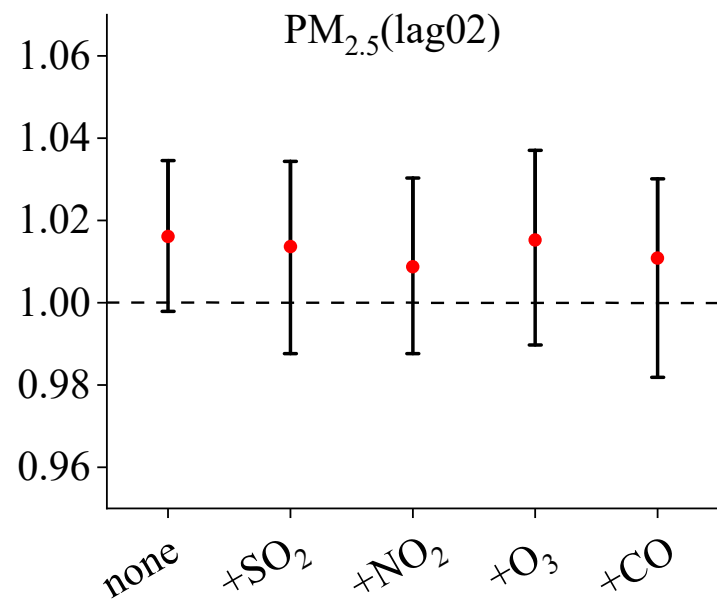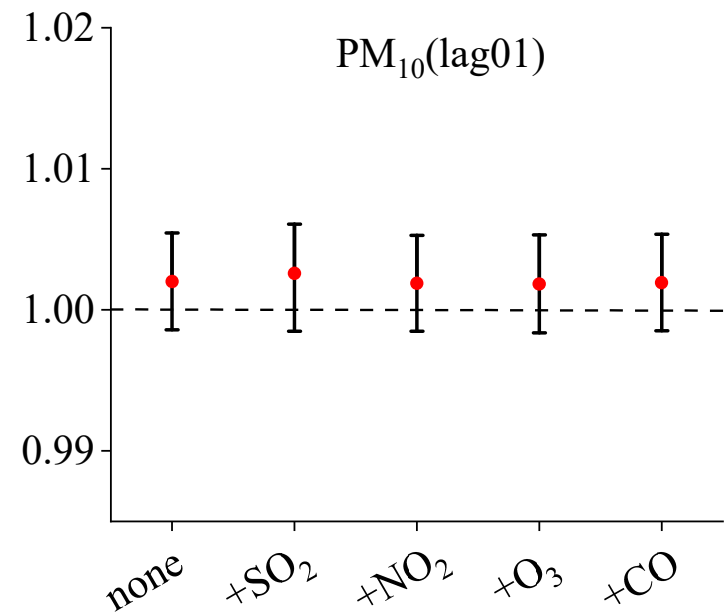

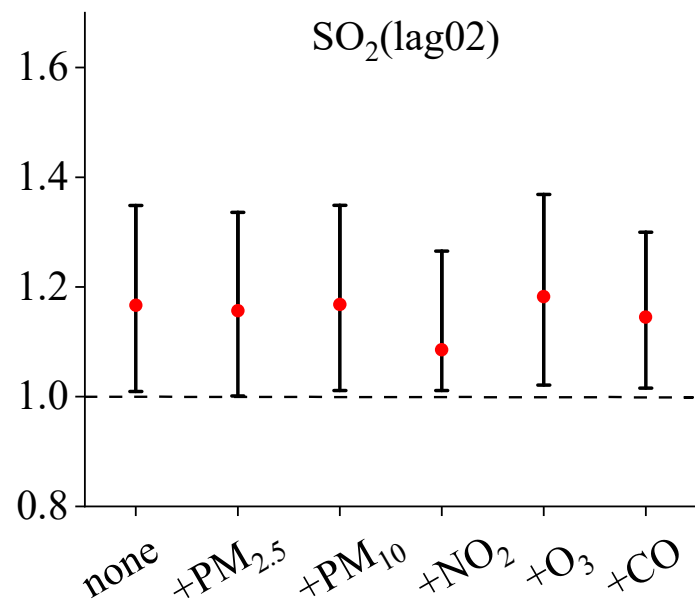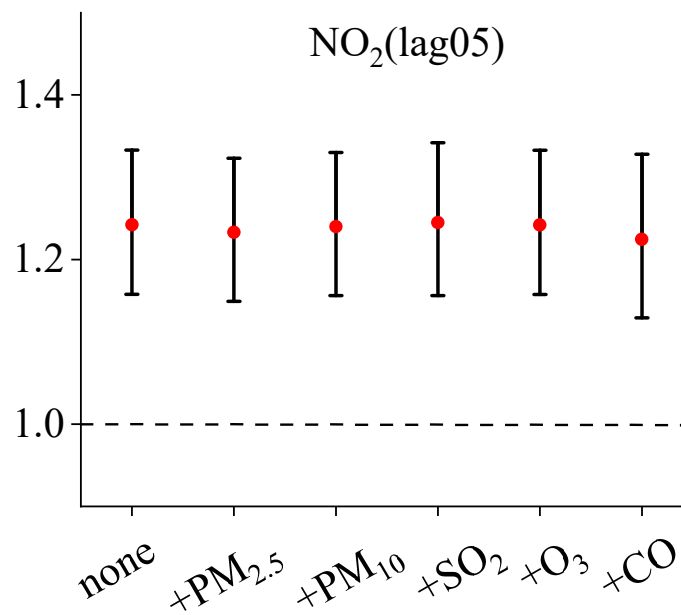

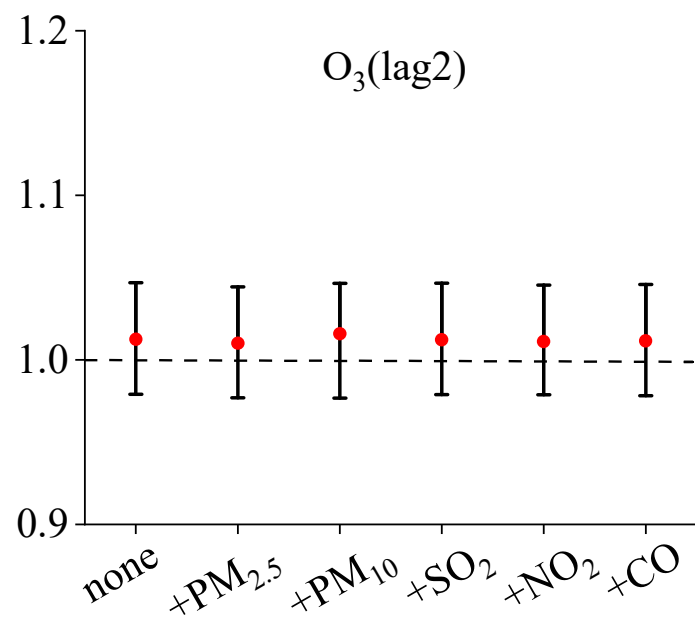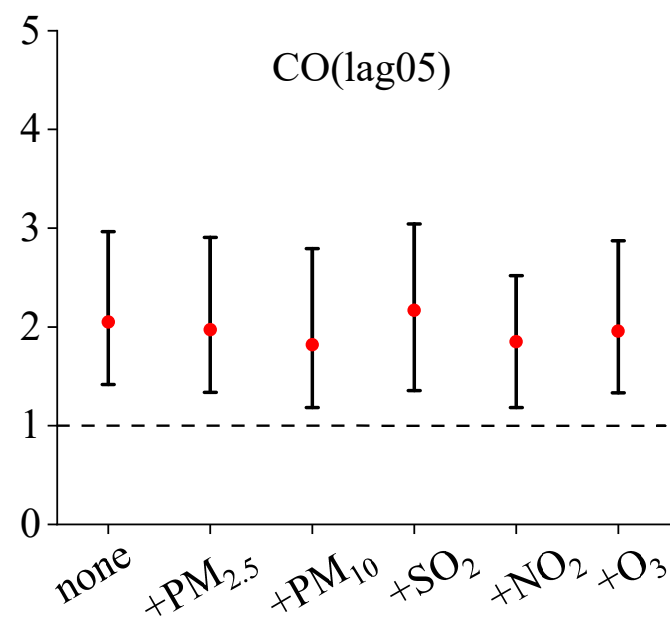

**Figure S1.** Association with a 10  $\mu\text{g}/\text{m}^3$  increase in air pollutants for COPD admissions using single, two pollutant models.

**Table S1.** Association between COPD admissions and ambient air pollutants: sensitivity varying controls in the regression time spline.

|       | PM <sub>2.5</sub> (lag02) | SO <sub>2</sub> (lag02) | NO <sub>2</sub> (lag05) | O <sub>3</sub> (lag2) | CO (lag05)         |
|-------|---------------------------|-------------------------|-------------------------|-----------------------|--------------------|
| df=6  | 1.017(0.999,1.036)        | 1.207(1.041,1.401)      | 1.282(1.191,1.380)      | 1.013(0.979,1.048)    | 2.132(1.479,3.074) |
| df=7  | 1.016(0.998,1.035)        | 1.167(1.009,1.348)      | 1.242(1.158,1.333)      | 1.012(0.979,1.047)    | 2.049(1.416,2.966) |
| df=8  | 1.017(0.999,1.035)        | 1.160(1.001,1.345)      | 1.262(1.173,1.357)      | 1.012(0.979,1.047)    | 2.114(1.453,3.075) |
| df=9  | 1.020(1.002,1.039)        | 1.143(0.984,1.327)      | 1.256(1.166,1.353)      | 1.015(0.981,1.05)     | 2.061(1.405,3.023) |
| df=10 | 1.017(0.999,1.036)        | 1.122(0.966,1.303)      | 1.253(1.163,1.349)      | 1.012(0.978,1.046)    | 1.952(1.333,2.86)  |

Note: The largest estimated effect of a given pollutant in the single-day lag model was used; Abbreviations: df, degree of freedom.
